# Supplementary material for: The synthetic lethal killing of RAD54B-deficient colorectal cancer cells by PARP1 inhibition is enhanced with SOD1 inhibition
Source: PubMed Central journal article supplement (PMC5349998; doi:10.18632/oncotarget.13654), 2016-11-26
Supplement: oncotarget-07-87417-s001.pdf [file oncotarget-07-87417-s001.pdf]

## The synthetic lethal killing of *RAD54B*-deficient colorectal cancer cells by *PARP1* inhibition is enhanced with *SOD1* inhibition

### SUPPLEMENTARY FIGURE AND TABLES

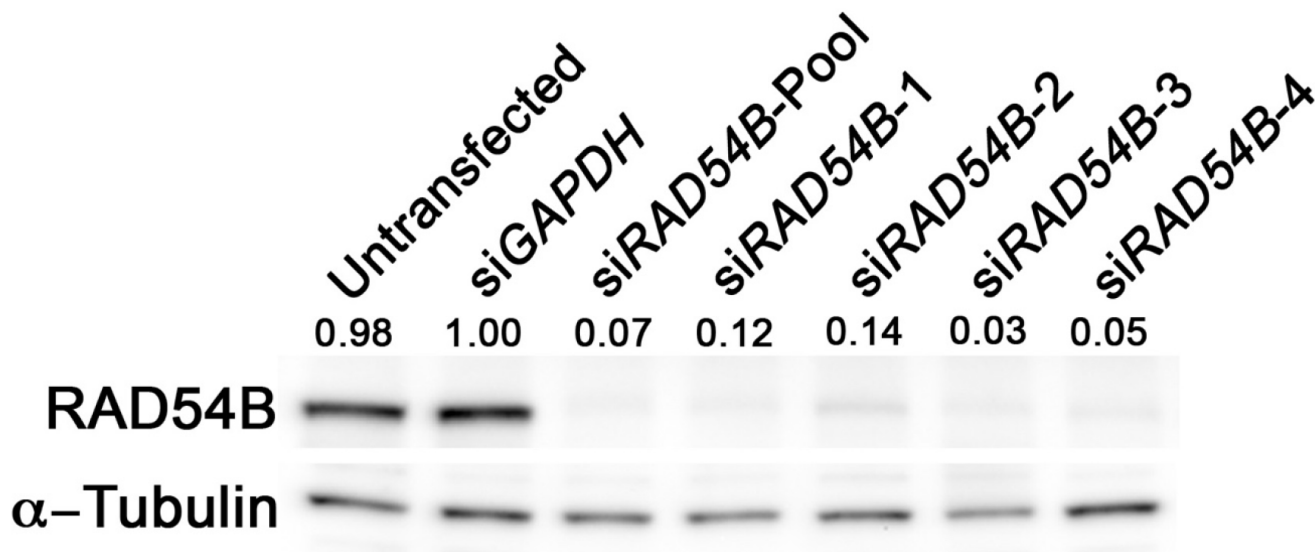

**Supplementary Figure S1: Efficiency of si*RAD54B*-based Silencing in HCT116 (*RAD54B*-Proficient) Cells.** Western blot showing diminished *RAD54B* expression following silencing relative to controls (Untransfected and si*GAPDH*);  $\alpha$ -Tubulin serves as the loading control. *RAD54B* expression levels are indicated above each lane and are presented relative to the si*GAPDH* control. Experiments were repeated at least two additional times.

**Supplementary Table S1: Student's *t*-tests identifying statistical differences in relative percentage of cells remaining following PARP1 silencing between *RAD54B*-proficient and *RAD54B*-deficient cells**

| siRNA treatment    | n <sup>A</sup> | Mean cell number ± SD <sup>B</sup> |                          | Mean normalized relative percentage <sup>C</sup> |                          | P-value  |
|--------------------|----------------|------------------------------------|--------------------------|--------------------------------------------------|--------------------------|----------|
|                    |                | <i>RAD54B</i> -proficient          | <i>RAD54B</i> -deficient | <i>RAD54B</i> -proficient                        | <i>RAD54B</i> -deficient |          |
| si <i>GAPDH</i>    | 6              | 14903 ± 303.1                      | 15870 ± 332.7            | 100 ± 2.034                                      | 100 ± 2.097              | > 0.9999 |
| si <i>PARP1</i> -P | 6              | 14355 ± 296.9                      | 14571 ± 523.0            | 96.32 ± 1.992                                    | 91.81 ± 3.296            | 0.0167   |
| si <i>PARP1</i> -1 | 6              | 13568 ± 267.4                      | 13884 ± 363.8            | 91.04 ± 1.794                                    | 87.48 ± 2.292            | 0.0135   |
| si <i>PARP1</i> -2 | 6              | 14504 ± 551.7                      | 14462 ± 335.6            | 97.32 ± 3.702                                    | 91.13 ± 2.114            | 0.0052   |
| si <i>PLK1</i>     | 6              | 1074 ± 405.8                       | 925 ± 579.9              | 7.206 ± 2.723                                    | 5.831 ± 3.654            | 0.4766   |

<sup>A</sup>n; number of wells analyzed.

<sup>B</sup>SD; standard deviation.

<sup>C</sup>All values are normalized to si*GAPDH* control for respective cell line.

Supplementary Table S2: Dual siRNA-based synthetic lethal testing in HCT116 cells

| siRNA treatment                          | n <sup>A</sup> | Mean cell number ± SD <sup>B</sup> | Normalized relative percentage <sup>C</sup> | Expected percentage <sup>D</sup> | Percent difference <sup>E</sup> |
|------------------------------------------|----------------|------------------------------------|---------------------------------------------|----------------------------------|---------------------------------|
| si <i>GAPDH</i>                          | 6              | 15356 ± 721.4                      | 100 ± 4.698                                 | N/A                              | N/A                             |
| si <i>RAD54B</i>                         | 6              | 14130 ± 914.3                      | 92.02 ± 5.955                               | N/A                              | N/A                             |
| si <i>PARP1</i> -P                       | 6              | 13006 ± 967.0                      | 84.70 ± 6.297                               | N/A                              | N/A                             |
| si <i>PARP1</i> -1                       | 6              | 12791 ± 746.7                      | 83.30 ± 4.863                               | N/A                              | N/A                             |
| si <i>PARP1</i> -2                       | 6              | 12693 ± 354.1                      | 82.66 ± 2.306                               | N/A                              | N/A                             |
| si <i>RAD54B</i> +<br>si <i>PARP1</i> -P | 6              | 8908 ± 1120                        | 58.01 ± 7.293                               | 77.938                           | 26                              |
| si <i>RAD54B</i> +<br>si <i>PARP1</i> -1 | 6              | 9515 ± 892.2                       | 61.97 ± 5.811                               | 76.654                           | 19                              |
| si <i>RAD54B</i> +<br>si <i>PARP1</i> -2 | 5              | 10220 ± 1440                       | 66.56 ± 9.377                               | 76.067                           | 18                              |
| si <i>PLK1</i>                           | 6              | 859 ± 45.11                        | 5.596 ± 0.2938                              | N/A                              | N/A                             |

<sup>A</sup>n; number of wells analyzed.

<sup>B</sup>SD; standard deviation.

<sup>C</sup>All values are normalized to si*GAPDH* control for respective cell line.

<sup>D</sup>Calculated by multiplying the normalized percentage of the two individual siRNAs.

<sup>E</sup>Calculated as  $1 - (\text{Normalized relative percentage} / \text{expected percentage}) \times 100$  (N/A; not applicable).

**Supplementary Table S3: Student's *t*-tests reveal statistical differences of relative percentage of cells remaining following BMN673 treatment within *RAD54B*-deficient cells compared to controls**

| Drug Treatment | n <sup>A</sup> | Mean cell number ± SD <sup>B</sup> |                          | Mean normalized relative percentage <sup>C</sup> ± SD |                          | <i>P</i> -value |
|----------------|----------------|------------------------------------|--------------------------|-------------------------------------------------------|--------------------------|-----------------|
|                |                | <i>RAD54B</i> -proficient          | <i>RAD54B</i> -deficient | <i>RAD54B</i> -proficient                             | <i>RAD54B</i> -deficient |                 |
| DMSO           | 6              | 12791 ± 759.5                      | 11743 ± 859.9            | 100 ± 5.938                                           | 100 ± 7.322              | > 0.9999        |
| 2 nM BMN673    | 6              | 12509 ± 409.1                      | 10306 ± 601.5            | 97.79 ± 3.198                                         | 87.76 ± 5.122            | 0.0022          |
| 20 nM BMN673   | 6              | 6911 ± 701.1                       | 4933 ± 230.5             | 54.03 ± 5.481                                         | 42.01 ± 1.963            | 0.0005          |

<sup>A</sup>n; number of wells analyzed.

<sup>B</sup>SD; standard deviation.

<sup>C</sup>All values are normalized to vehicle control (DMSO) for respective cell line.

**Supplementary Table S4: Student's *t*-tests identify statistical differences of relative percentage of cells remaining following olaparib treatment within *RAD54B*-deficient cells compared to controls**

| Drug Treatment  | n <sup>A</sup> | Mean cell number ± SD <sup>B</sup> |                          | Mean normalized relative percentage <sup>C</sup> ± SD |                          | P-value  |
|-----------------|----------------|------------------------------------|--------------------------|-------------------------------------------------------|--------------------------|----------|
|                 |                | <i>RAD54B</i> -proficient          | <i>RAD54B</i> -deficient | <i>RAD54B</i> -proficient                             | <i>RAD54B</i> -deficient |          |
| DMSO            | 6              | 14567 ± 506.5                      | 15330 ± 525.4            | 100 ± 3.477                                           | 100 ± 3.427              | > 0.9999 |
| 0.2 μM Olaparib | 6              | 13032 ± 373.8                      | 12982 ± 506.5            | 89.46 ± 2.566                                         | 84.68 ± 3.304            | 0.0386   |
| 2.0 μM Olaparib | 6              | 10202 ± 386.8                      | 9293 ± 449.4             | 70.03 ± 2.655                                         | 60.62 ± 2.931            | 0.0016   |

<sup>A</sup>n; number of wells analyzed.

<sup>B</sup>SD; standard deviation.

<sup>C</sup>All values are normalized to vehicle control (DMSO) for respective cell line.

**Supplementary Table S5: Student's *t*-tests reveal statistical differences of relative percentage of cell confluency following BMN673 treatment within *RAD54B*-deficient cells compared to controls in modified 2D colony forming assays**

| Drug Treatment | n <sup>A</sup> | Mean normalized relative percentage <sup>B</sup> ± SD <sup>C</sup> |                          | P-value  |
|----------------|----------------|--------------------------------------------------------------------|--------------------------|----------|
|                |                | <i>RAD54B</i> -proficient                                          | <i>RAD54B</i> -deficient |          |
| DMSO           | 6              | 100 ± 5.47                                                         | 100 ± 5.81               | > 0.9999 |
| BMN673         | 6              | 36.76 ± 10.91                                                      | 19.48 ± 2.09             | 0.0034   |

<sup>A</sup>n; number of wells analyzed.

<sup>B</sup>All values are normalized to vehicle control (DMSO) for respective cell line.

<sup>C</sup>SD; standard deviation.

**Supplementary Table S6: Student's *t*-tests identify statistical differences of relative percentage of cell confluency following olaparib treatment within *RAD54B*-deficient cells compared to controls in modified 2D colony forming assays**

| Drug Treatment | n <sup>A</sup> | Mean normalized relative percentage <sup>B</sup> ± SD <sup>C</sup> |                          | <i>P</i> -value |
|----------------|----------------|--------------------------------------------------------------------|--------------------------|-----------------|
|                |                | <i>RAD54B</i> -proficient                                          | <i>RAD54B</i> -deficient |                 |
| DMSO           | 6              | 100 ± 2.28                                                         | 100 ± 3.95               | > 0.9999        |
| Olaparib       | 6              | 42.86 ± 15.04                                                      | 15.73 ± 4.89             | 0.0018          |

<sup>A</sup>n; number of wells analyzed.

<sup>B</sup>All values are normalized to vehicle control (DMSO) for respective cell line.

<sup>C</sup>SD; standard deviation.

**Supplementary Table S7: Proliferation defect (PD<sup>A</sup>) values calculated from RTCA proliferation curves**

| <b>Inhibitor</b> | <b><i>RAD54B</i>-proficient PD ± SD<sup>C</sup></b> | <b><i>RAD54B</i>-deficient PD ± SD<sup>C</sup></b> | <b>Fold Increase<sup>B</sup></b> |
|------------------|-----------------------------------------------------|----------------------------------------------------|----------------------------------|
| BMN673           | 0.55 ± 0.05                                         | 51.80 ± 5.35                                       | 94.18                            |
| Olaparib         | 1.71 ± 0.18                                         | 17.83 ± 2.19                                       | 10.43                            |

<sup>A</sup>PD; Proliferation defect.

<sup>B</sup>Fold increase; *RAD54B*-deficient PD/*RAD54B*-proficient PD.

<sup>C</sup>SD; standard deviation.



**Supplementary Table S8: Student's *t*-tests identifying statistical differences of total  $\gamma$ -H2AX signal intensity following BMN673 and olaparib treatment**

| Treatment | n <sup>A</sup> | Mean total $\gamma$ -H2AX signal intensity $\pm$ SD <sup>B</sup> ( $\times 10^6$ A.U.) |                          | P-value |
|-----------|----------------|----------------------------------------------------------------------------------------|--------------------------|---------|
|           |                | <i>RAD54B</i> -proficient                                                              | <i>RAD54B</i> -deficient |         |
| IR        | 175            | 15.8 $\pm$ 7.05                                                                        | 15.6 $\pm$ 7.59          | 0.8202  |
| DMSO      | 175            | 6.23 $\pm$ 3.06                                                                        | 5.83 $\pm$ 2.7           | 0.1928  |
| BMN673    | 175            | 7.52 $\pm$ 4.94                                                                        | 9.19 $\pm$ 6.23          | 0.0058  |
| Olaparib  | 175            | 7.99 $\pm$ 4.40                                                                        | 10.6 $\pm$ 6.88          | <0.0001 |

<sup>A</sup>n; number of cells evaluated.

<sup>B</sup>SD; standard deviation.

**Supplementary Table S9: Student's *t*-tests identifying statistical differences of percent of cells with activated cleaved Caspase-3 signal within *RAD54B*-deficient cells following BMN673 and olaparib treatment**

| Drug Treatment | N <sup>A</sup> | Percentage of cells with activated cleaved Caspase-3 ± SD <sup>B</sup> |                          | P-value |
|----------------|----------------|------------------------------------------------------------------------|--------------------------|---------|
|                |                | <i>RAD54B</i> -proficient                                              | <i>RAD54B</i> -deficient |         |
| Staurosporine  | 2              | 2.66 ± 0.28                                                            | 2.35 ± 0.19              | 0.3285  |
| DMSO           | 2              | 0.05 ± 0.07                                                            | 0.04 ± 0.05              | 0.8531  |
| BMN673         | 2              | 0.50 ± 0.01                                                            | 0.69 ± 0.03              | 0.0132  |
| Olaparib       | 2              | 0.23 ± 0.08                                                            | 0.70 ± 0.01              | 0.0125  |

<sup>A</sup>N; number of experimental replicates.

<sup>B</sup>SD; standard deviation.

Supplementary Table S10: BMN673 and 5-FU combinatorial drug treatments in *RAD54B*-deficient cells

| Drug Treatment   | n <sup>A</sup> | Mean normalized relative percentage <sup>B</sup> ± SD <sup>C</sup> | Expected percentage <sup>D</sup> | Percent difference <sup>E</sup> |
|------------------|----------------|--------------------------------------------------------------------|----------------------------------|---------------------------------|
| DMSO             | 3              | 100 ± 3.69                                                         | N/A                              | N/A                             |
| BMN673           | 3              | 64.57 ± 7.73                                                       | N/A                              | N/A                             |
| 5-FU             | 3              | 106.33 ± 2.12                                                      | N/A                              | N/A                             |
| BMN673<br>+ 5-FU | 3              | 60.31 ± 7.34                                                       | 68.65                            | 12.16                           |

<sup>A</sup>n; number of wells analyzed.

<sup>B</sup>All values are normalized to vehicle control (DMSO).

<sup>C</sup>SD; standard deviation.

<sup>D</sup>Calculated by multiplying the normalized percentage of the two individual drugs.

<sup>E</sup>Calculated as  $1 - (\text{Normalized relative percentage} / \text{expected percentage}) \times 100$  (N/A; not applicable).

Supplementary Table S11: BMN673 and LCS-1 combinatorial drug treatments in *RAD54B*-deficient cells

| Drug Treatment | n <sup>A</sup> | Mean normalized relative percentage <sup>B</sup> ± SD <sup>C</sup> | Expected percentage <sup>D</sup> | Percent difference <sup>E</sup> |
|----------------|----------------|--------------------------------------------------------------------|----------------------------------|---------------------------------|
| DMSO           | 3              | 100 ± 0.27                                                         | N/A                              | N/A                             |
| BMN673         | 3              | 74.50 ± 7.31                                                       | N/A                              | N/A                             |
| LCS-1          | 3              | 93.98 ± 1.75                                                       | N/A                              | N/A                             |
| BMN673 + LCS-1 | 3              | 5.034 ± 1.77                                                       | 70.02                            | 92.81                           |

<sup>A</sup>n; number of wells analyzed.

<sup>B</sup>All values are normalized to vehicle control (DMSO).

<sup>C</sup>SD; standard deviation.

<sup>D</sup>Calculated by multiplying the normalized percentage of the two individual drugs.

<sup>E</sup>Calculated as  $1 - (\text{Normalized relative percentage} / \text{expected percentage}) \times 100$  (N/A; not applicable).
